# Supplementary material
Source: Springer Nature journal article supplement (https://www.springermedizin.de/resource/supplementary/12990_2005_17_MOESM3_ESM.pdf/9612168)

**a**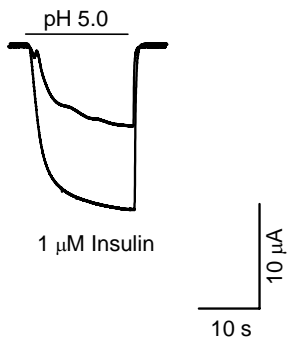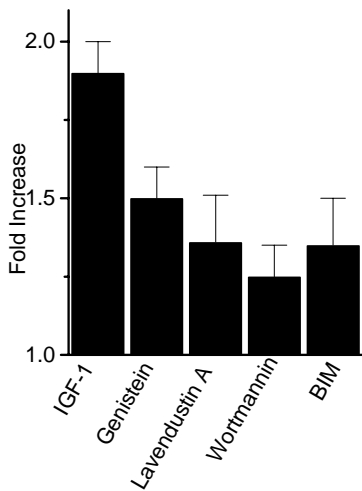**b**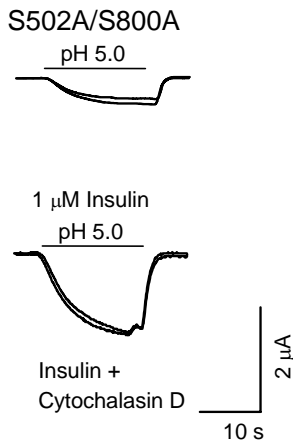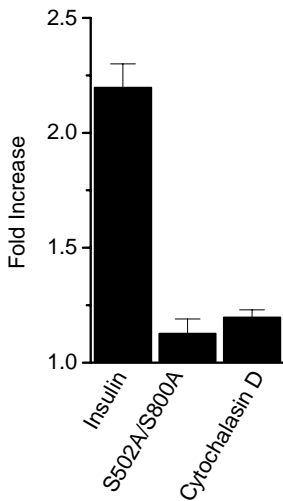

Supplement: MOESM3 [file 9612168]
